# Supplementary material
Source: Springer Nature journal article supplement (http://publikationen.ub.uni-frankfurt.de/opus4/files/34572/12977_2013_3895_MOESM8_ESM.pdf)

**A**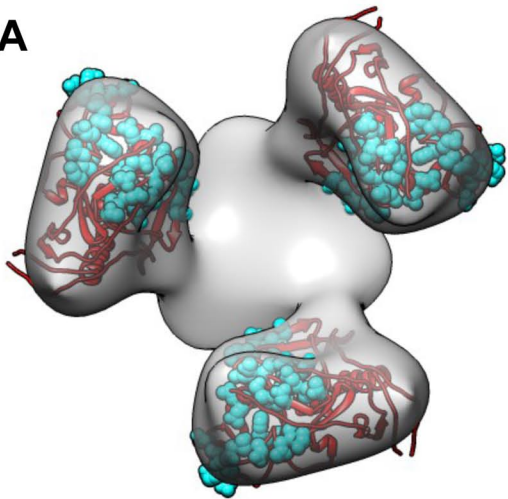**B**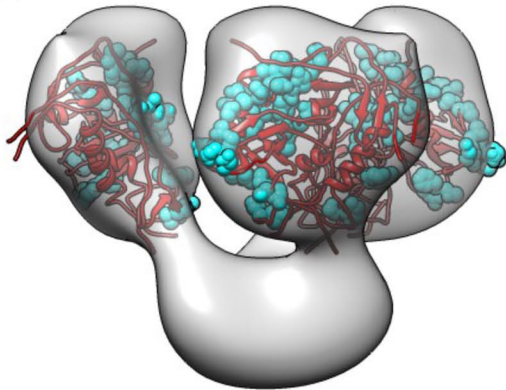

Supplement: MOESM8 [file 12977_2013_3895_MOESM8_ESM.pdf]
